# Supplementary material for: Measurement report: Methane (CH 4 ) sources in Krakow, Poland: insights from isotope analysis
Source: Copernicus journal article supplement (doi:10.5194/acp-2021-146), 2021-04-22
Supplement: Supplementary file 1 [file acp-2021-146-supplement.pdf]

## **Supplementary material**

**Title:**

Methane (CH<sub>4</sub>) sources in Krakow, Poland: insights from isotope analysis

**Authors:**

Malika Menoud, Carina van der Veen, Jaroslaw Necki, Jakub Bartyzel, Barbara Szénási, Mila Stanisavljević, Isabelle Pison, Philippe Bousquet, and Thomas Röckmann

**Correspondance:** m.menoud@uu.nl

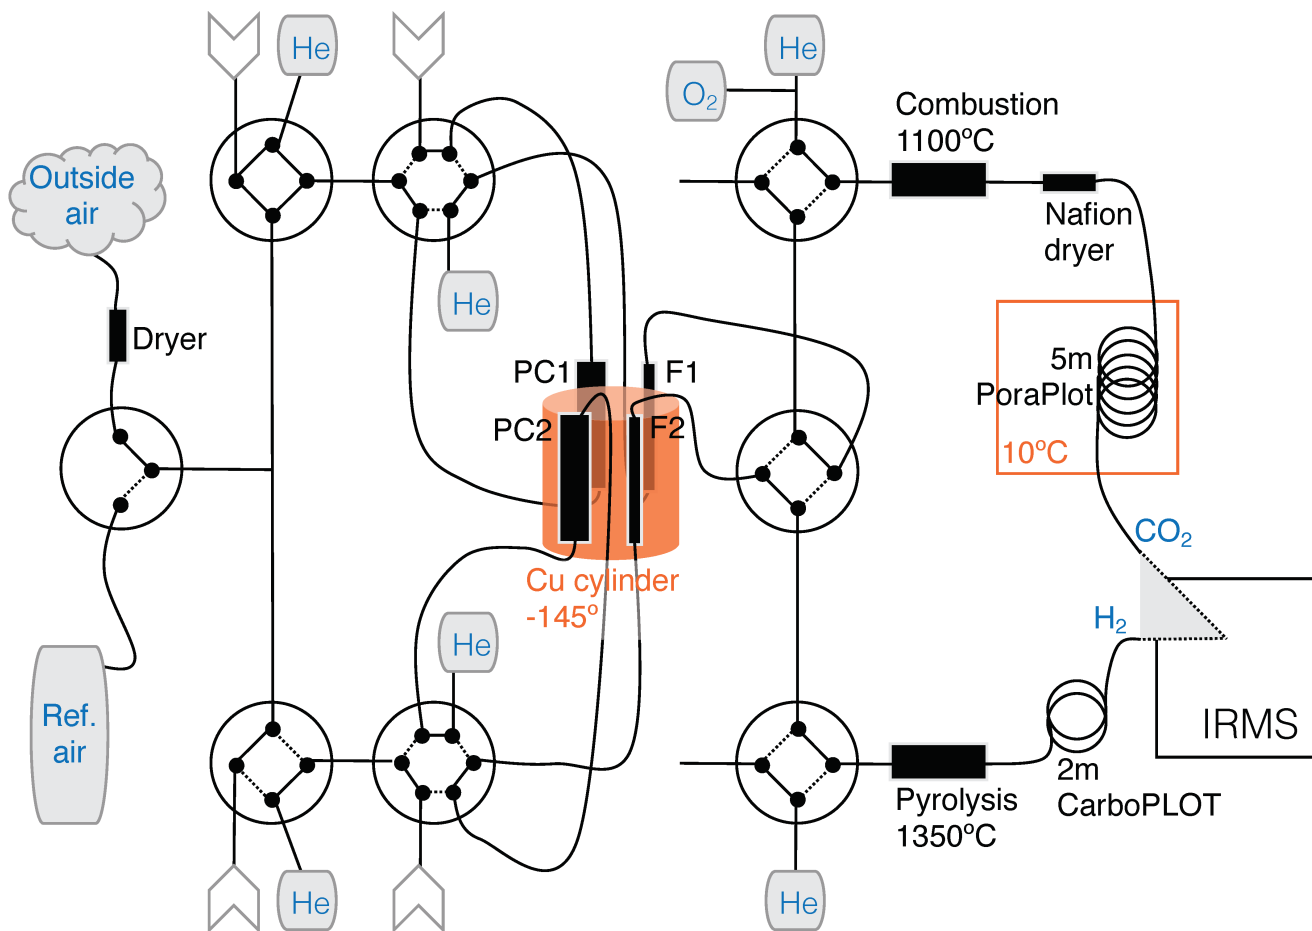

**Figure S1:** Diagram of the extraction system for methane isotopic measurements in ambient air. PC: pre-concentration, F: focus traps, two 10 cm stainless steel tubes (1/8" and 1/16" o.d., respectively) filled with 2 cm HayeSep D in the centre and glass beads at both ends.

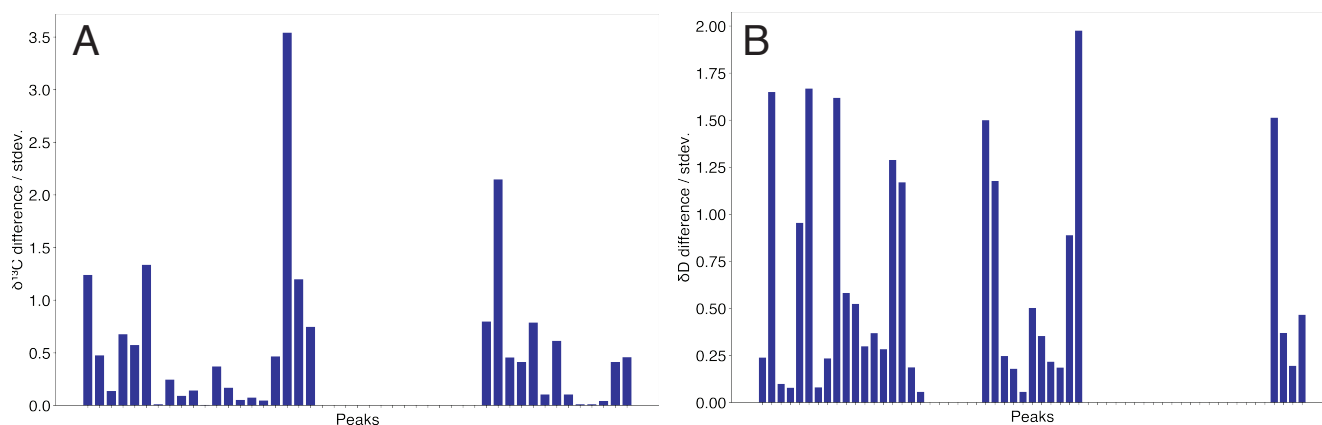

**Figure S2:** Ratio of the peak source signature difference between original and "corrected"  $\chi(\text{CH}_4)$  data, over the original signature uncertainties (standard deviation,  $\sigma$ ). For the "corrected"  $\chi(\text{CH}_4)$ , we applied an offset to the IRMS data to match the CRDS data in the periods where an offset was observed. Most differences are lower than  $2\sigma$  for  $\delta^{13}\text{C}$  (A), and  $\delta^2\text{H}$  (B).

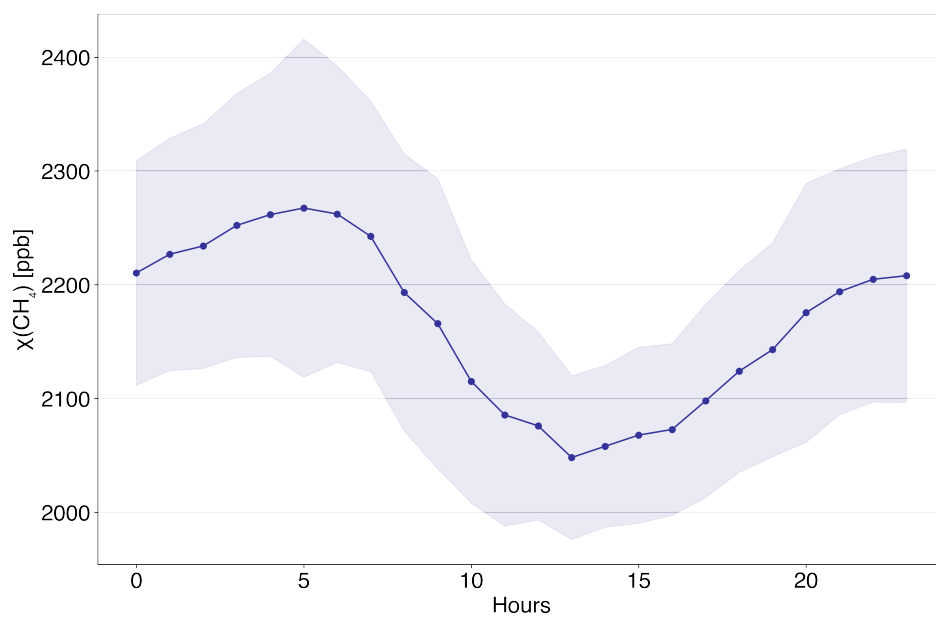

**Figure S3:**  $\text{CH}_4$  mole fraction hourly averages during the fall (September 14 to November 15, 2018). Size of shaded area is  $1\sigma$ .

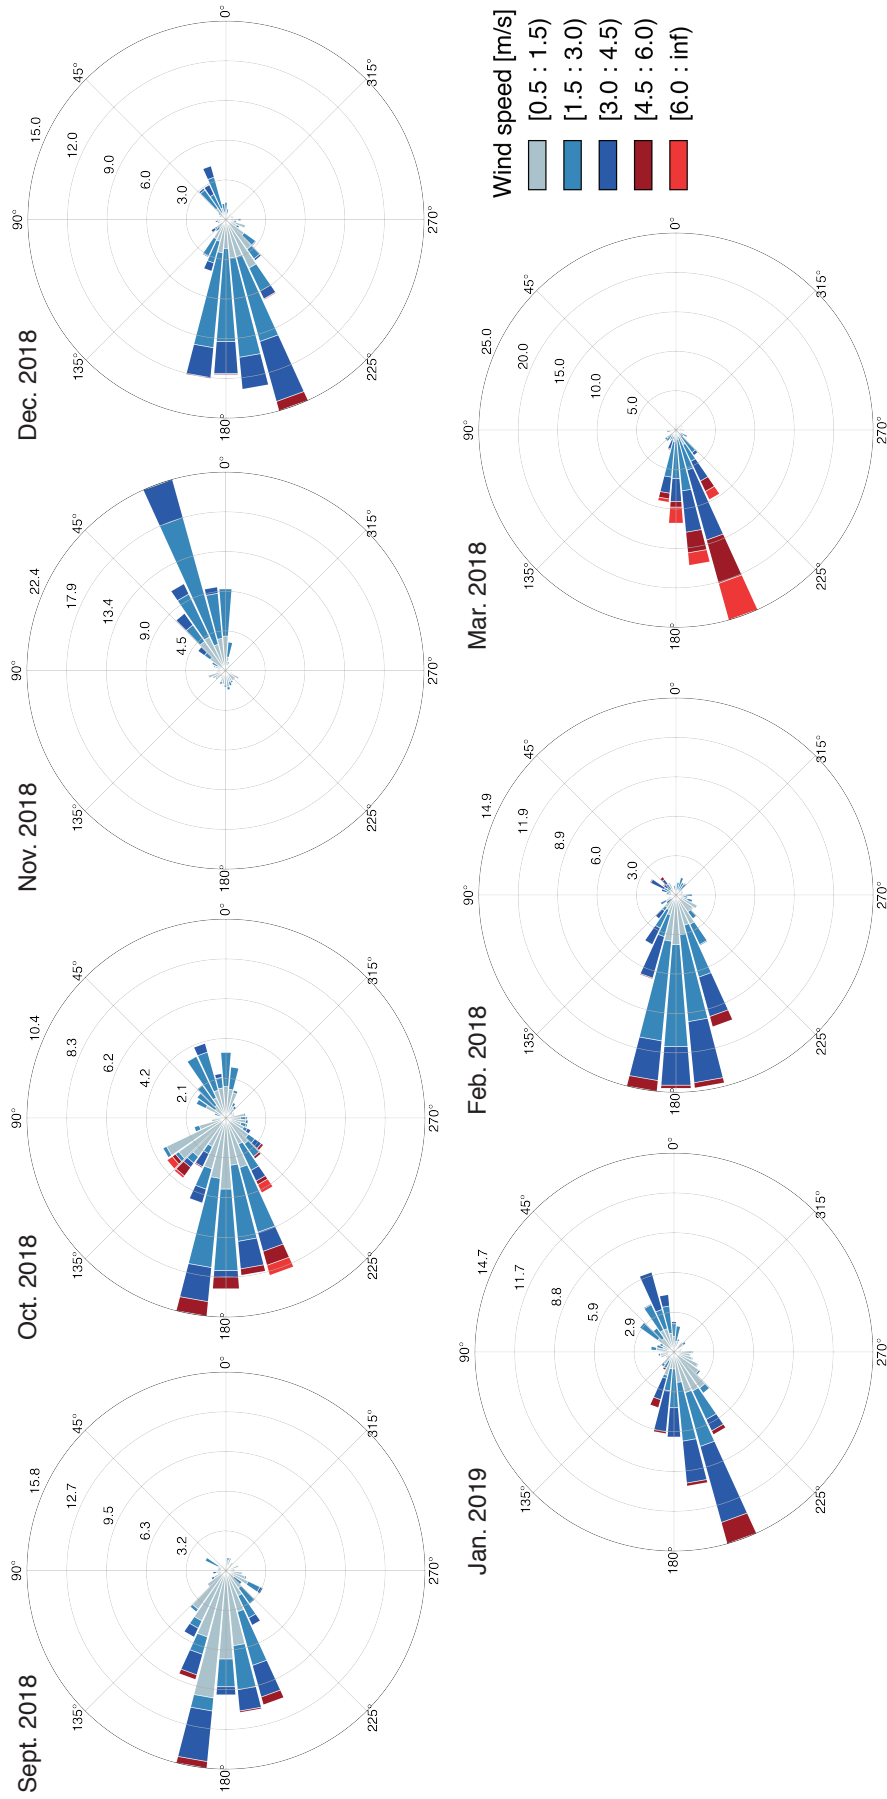

**Figure S4:** Monthly wind directions during the ambient air measurement period, at the measurement location. Bar lengths are percentages of records during the specified month (r-axis); colours define the wind speed range (legend).

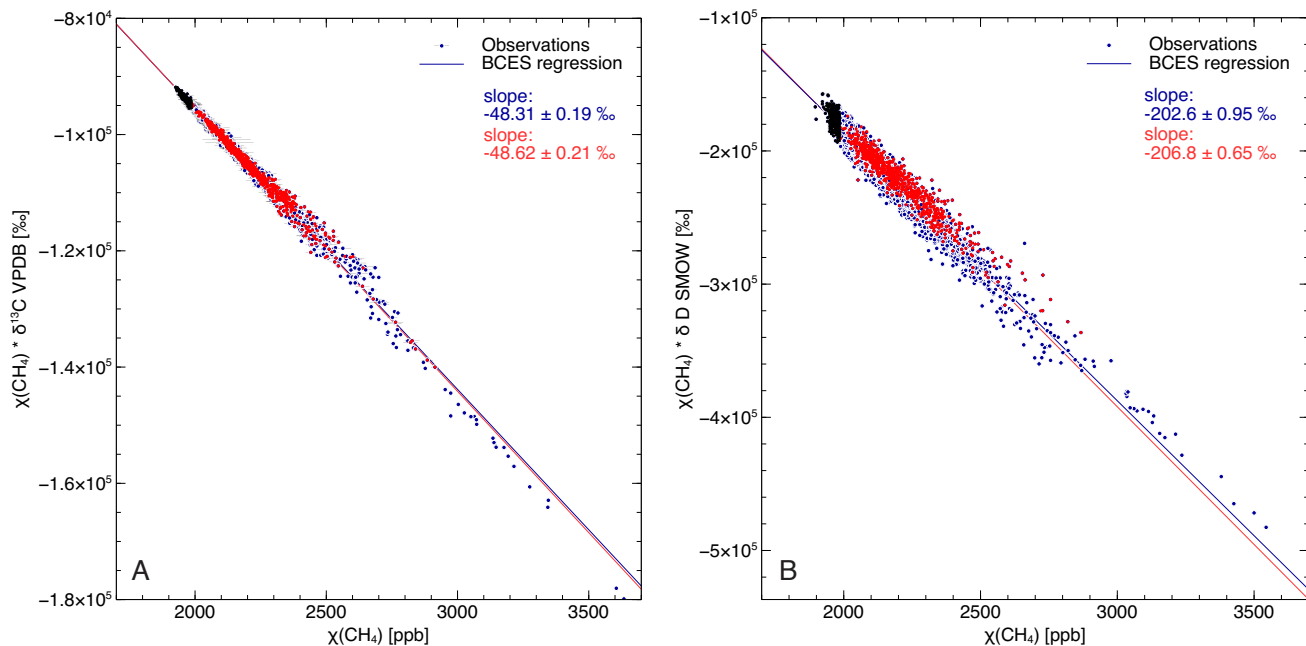

**Figure S5:** Miller-Tans plots using all the **A.**  $\delta^{13}\text{C}\text{-CH}_4$  and **B.**  $\delta^2\text{H}\text{-CH}_4$  data in ambient air collected during the measurement period. The red points show when there was a mismatch in the mole fractions between the IRMS and CRDS instruments, and the black points show the background data ( $\chi(\text{CH}_4) < 1986.0$  ppb, i.e.  $10^{\text{th}}$  lower percentile).

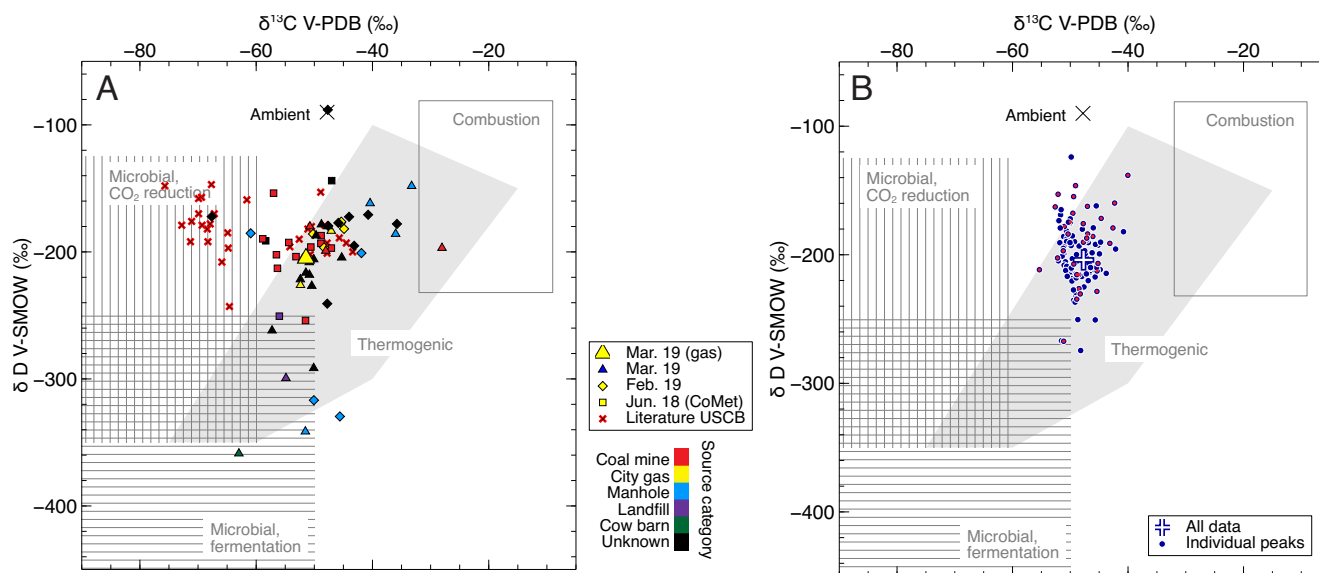

**Figure S6:** Dual isotope diagrams with signature ranges of specific  $\text{CH}_4$  formation processes (background grey patterns), reproduced from Milkov and Etiope (2018). **A.** Source signatures of the sampled sites around Krakow and in the USCB (Kotarba 2001, Kotarba and Pluta 2009 and Kedzior et al. 2013). **B.** Source signatures of the emission peaks measured in ambient air. Red points: mismatch in the mole fractions between the IRMS and CRDS instruments, which peak isotopic signatures did not significantly differ (we retained all the data).

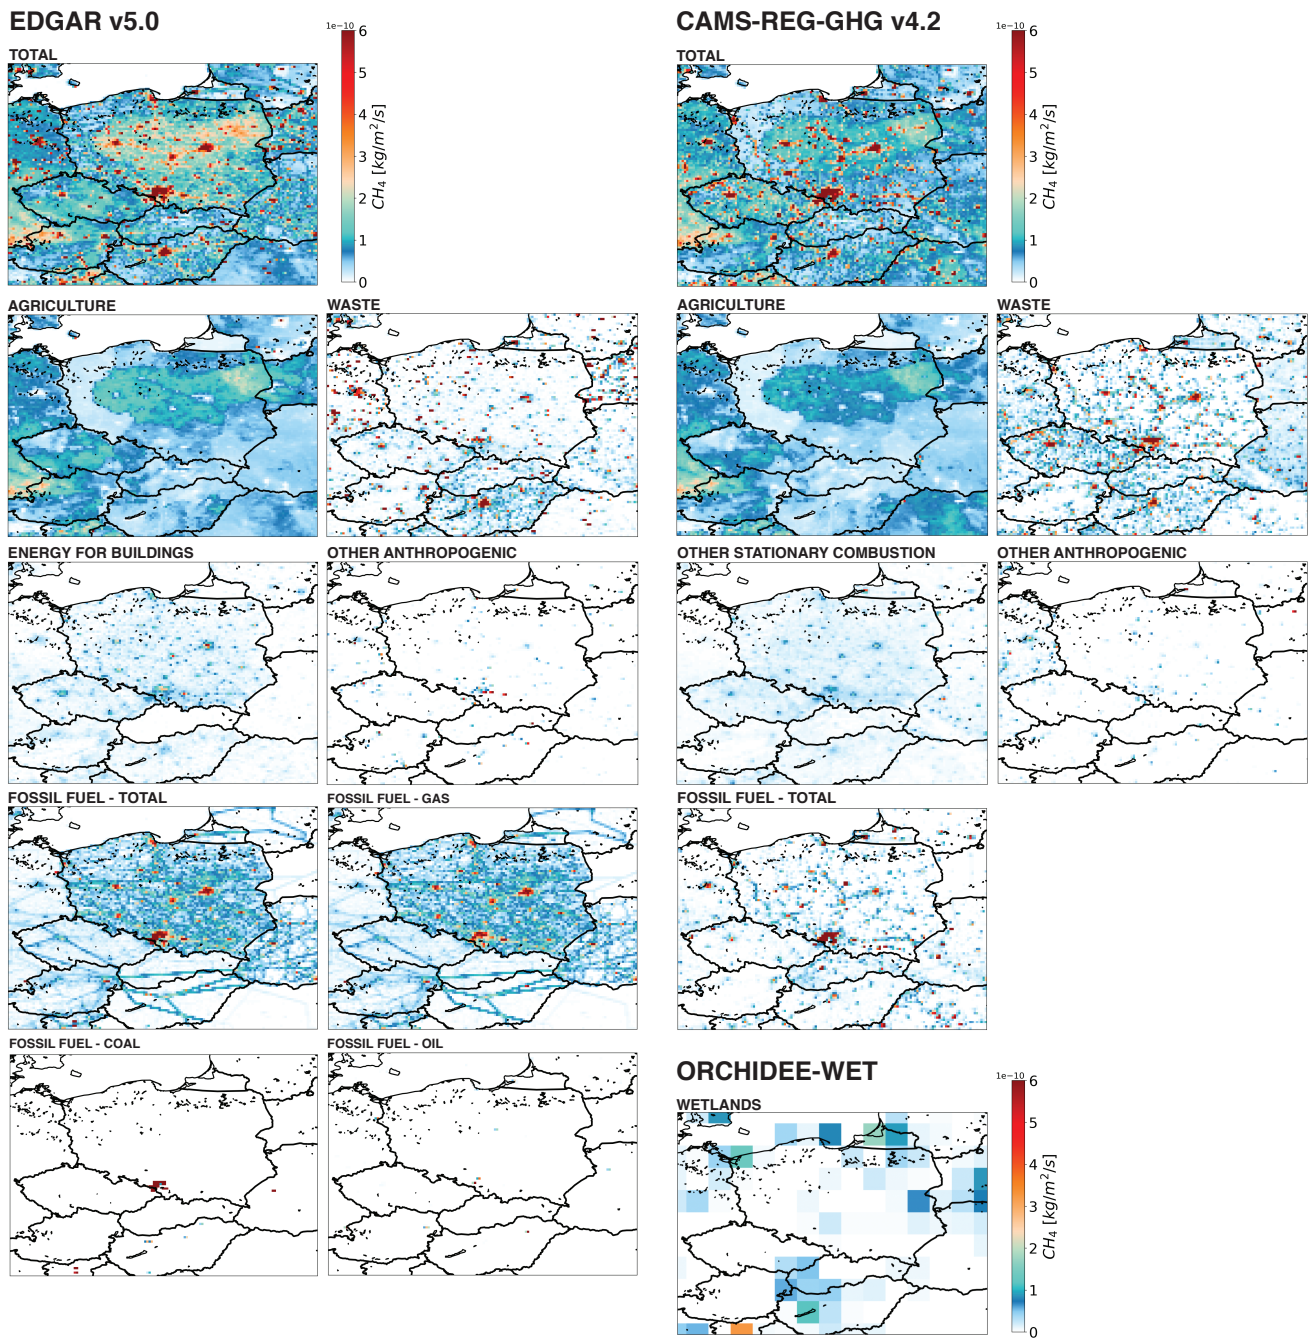

**Figure S7:** Reported CH<sub>4</sub> emission rates over the domain used in CHIMERE, from two inventories: EDGAR v5.0 (left columns) and CAMS-REG v4.2 (right column).
